# Supplementary material for: Extracellular Matrix From Hypertrophic Myocardium Provokes Impaired Twitch Dynamics in Healthy Cardiomyocytes
Source: PubMed Central journal article supplement — JACC Basic Transl Sci. 2019 Jul 24;4(4):495–505. doi: 10.1016/j.jacbts.2019.03.004 (PMC6712054; doi:10.1016/j.jacbts.2019.03.004), 2019-07-24
Supplement: mmc1.pdf [file mmc1.pdf]

Online Appendix

**Supplemental Table 1. qPCR Primers**

|         | Description                                                                                | cDNA<br>size<br>(bp) | Forward                  | Reverse                | gDNA<br>size<br>(bp) |
|---------|--------------------------------------------------------------------------------------------|----------------------|--------------------------|------------------------|----------------------|
| GAPDH   | Homo sapiens<br>glyceraldehyde-3-phosphate<br>dehydrogenase (GAPDH)                        | 117                  | GAAGGTGAAGGTCGGAGTCA     | TTGAGGTCAATGAAGGGGTC   | 1749                 |
| NPPB    | Natriuretic Peptide B                                                                      | 109                  | TTTGGGAGGAAGATGGACC      | TGTGGAATCAGAAGCAGGTG   | 651                  |
| ATP2A2  | ATPase<br>Sarcoplasmic/Endoplasmic<br>Reticulum Ca <sup>2+</sup> transporter<br>2 (ATP2A2) | 138                  | GTGAATCTGTCTCTGTCAATC    | CTCCAGTTGCTACCACCACT   | 1215                 |
| CACNA1C | Calcium Voltage-Gated<br>Channel Subunit Alpha 1C                                          | 141                  | ACTTCATCATCCTCTTCATCTGTG | CCAGCTTCTTTCTCTCCTTCTC | 1701                 |
| TGFB2   | transforming growth factor<br>beta 2                                                       | 146                  | CTACAGACTTGAGTCACAAC     | CGTGTATCCATTCCACCCT    | 1341                 |
| PLN     | Phospholamban                                                                              | 138                  | CTGCCAAGGCTACCTAAAAG     | AGCTGAGCGAGTGAGGTATT   | 10570                |

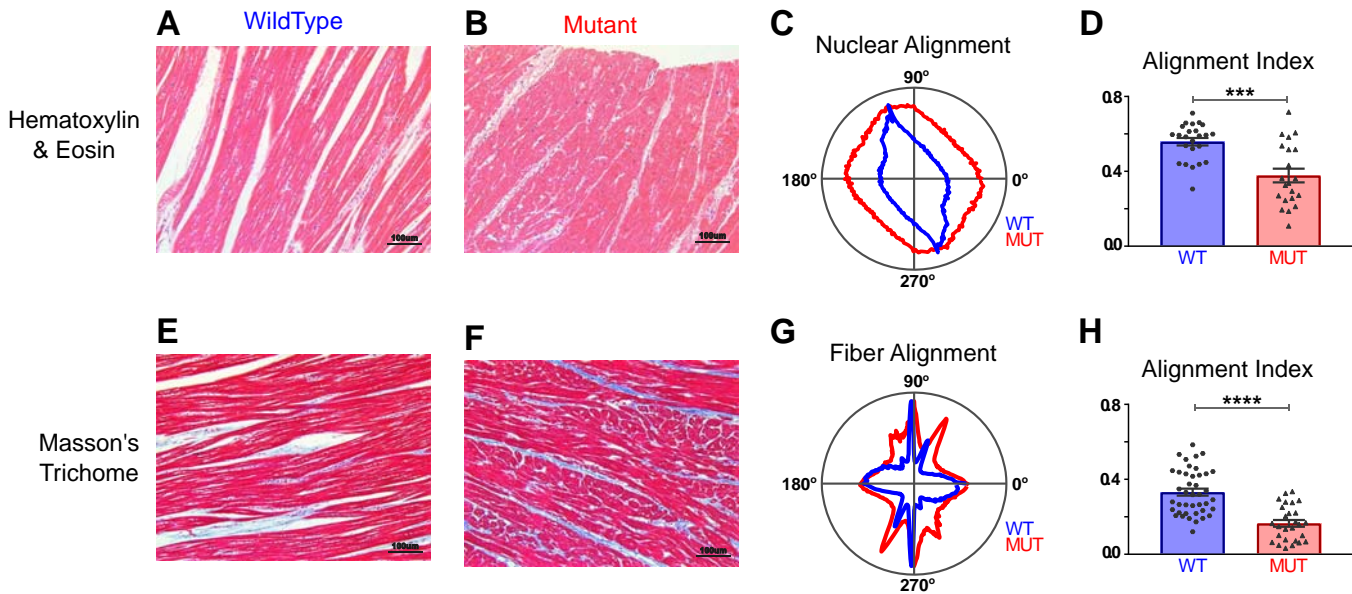

### Supplemental Figure 1. Additional Histological findings in wildtype and mutant ECM.

(A/B) Representative H&E imaging of WT and MUT porcine extracellular matrix (pECM). (E/F) Representative Trichrome imaging of WT and MUT pECM. (C/G) Representative fiber alignment quantification using FFT method. (D) Tissue alignment index calculated using nuclear orientation segmentation showed statistically significant decrease in MUT samples (n=21) compared to WT samples (n=24), 0.337 v. 0.5914,  $p < 0.0001$  by Mann-Whitney test. (H) Tissue alignment index calculated using fiber orientation segmentation showed statistically significant decrease in MUT samples (n=27) compared to WT samples (n=41), 0.3179 v. 0.1597,  $p = 0.001$  by Mann-Whitney test.

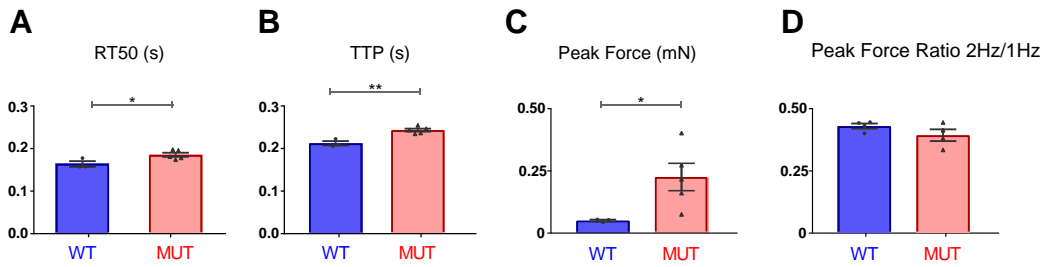

**Supplemental Figure 2. Active mechanics of EHTs at 16 days.**

(A) R403Q mutant ECM EHTs that were cultured for and additional 6 days continued to show an increase in early relaxation (RT50,  $p=0.0423$ ). (B) Time to Peak Tension (TTP) in mutant ECM EHTs was slower ( $p=0.0033$ ). (C) Peak force was significantly increased in mutant ECM EHTs ( $p=0.0357$ ). (D) Change in active force from 1Hz to 2Hz pacing was not significantly different ( $p=0.2$ ).

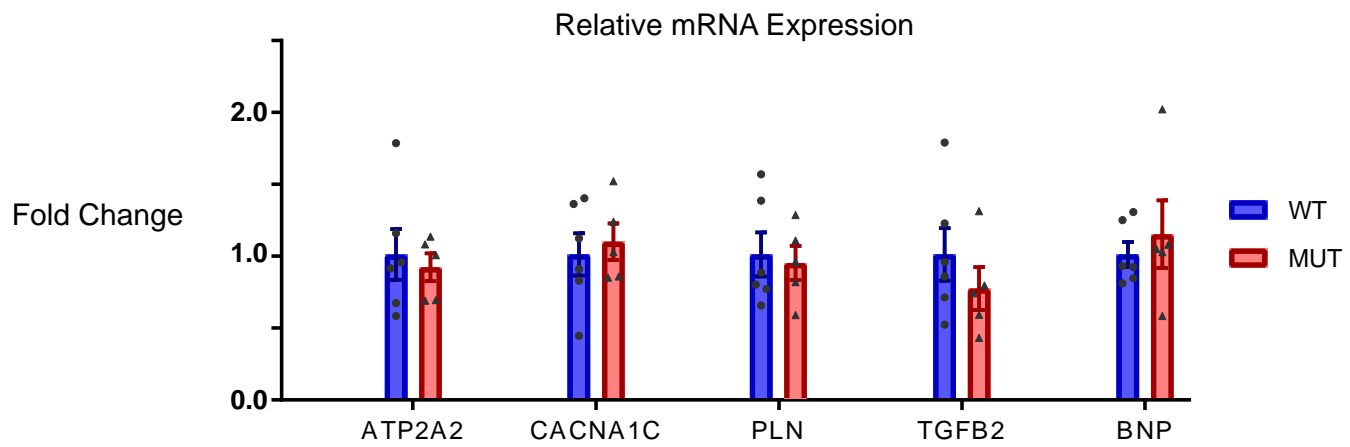

### Supplemental Figure 3. qPCR Analysis of Gene Expression in EHTs.

Transcripts were not found to be significantly different between R403Q mutant ECM EHTs and wild-type ECM EHTs for ATP2A2 ( $p=0.68$ ), CACNA1C ( $p=0.67$ ), PLN ( $p=0.77$ ), TGFB2 ( $p=0.35$ ), and BNP ( $p=0.56$ ).
